# Supplementary material
Source: Springer Nature journal article supplement (https://www.springermedizin.de/resource/supplementary/12884_2012_628_MOESM1_ESM.pdf/9457892)

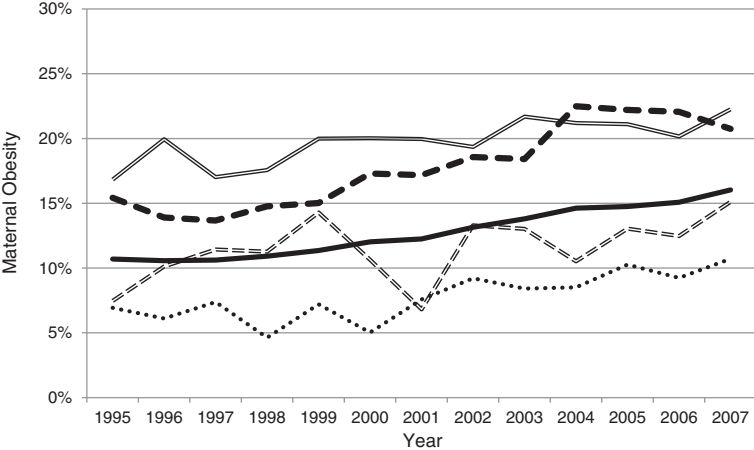

— White    == South Asian    - - Black    =. Mixed    . . . Chinese or Other Ethnic Group

Supplement: MOESM1 [file 9457892]
